# Supplementary material
Source: publisher site journal article supplement (https://www.dovepress.com/article/541632)
Supplement: Supplementary file 1 [file Supplemental%20Material%20CHW_1.docx]

**Supplemental Material:**

**Supplemental Figure 1**

Semi-structured Interview Guide

1. [Introduction]
2. Thank you for taking the time to speak with me today. We want to know how different experiences outside of the eye clinic affect your eye care. We want to know how you feel being asked these questions by your eye care team. There are no right or wrong answers; we just want to hear your thoughts.
3. [Barriers to Eye Care]
4. Some people say they can’t always go to the eye doctor because they have to deal with things that are more important or pressing. What do you think are the biggest barriers to getting regular eye care?
5. [SDoH Probes] How about you have you ever __________
6. Forgot about your appointment, did not know you were supposed to go
7. Been sick and could not make it had other responsibilities (taking care of a family member)
8. not been able to take off time from work
9. had trouble getting transportation to the eye doctor?
10. [SDoH Probes] Have you ever missed an appointment because __
11. Is it that you were worried about your housing,
12. worried about getting food,
13. worried about affording your medications,
14. had other health issues to deal with?
15. Please tell me more.
16. [General Acceptability of Social Determinants of Health Questions]
17. We just talked a lot about your experiences outside of the eye clinic. How do you feel talking about these topics?

[Probes]

1. Would you prefer to answer these questions verbally or in written format?
2. Who do you think should ask you these questions if you’re at the eye doctor’s office, the front desk, the technician, your provider, someone else?
3. When do you think these questions should be asked: before the visit, during the visit, or after the visit is completed?
4. How would you feel if your eye care team asked you to fill out a questionnaire with all of these questions? If given a pre-visit questionnaire in paper/table form, how likely would you complete it?
5. Are there issues that you think your eye care team should not ask about, or questions that should be off limits?

1. [Acceptability of Community Health Worker (CHW)]
2. Finally, I want to get your advice on what we could do to lessen the challenges of coming to the eye doctor. How would you help people address some of the problems we spoke about?

[Probes]

1. What do you think would help you see the eye doctor regularly?
2. Who would you trust to help?
3. Do you think people would be interested in receiving assistance to help tackle these challenges?

[Additional Probes]

1. Do you currently know of any programs that would help you with some of the issues asked about?
2. Do you currently know of any programs that would help people with some of the challenges that they may have when coming to the eye doctor?
3. We’re trying to figure out the best way to help people with those things. One idea that has been suggested is that there could be someone at the eye doctor’s office who can help people get connected to resources in their community. They could talk to you about the problems that need to be addressed, then help you find resources in your community to address them. What do you think about a program like that?

[Probes]

1. Would you prefer that person to go with you to the community resources?
2. Would you prefer for them to just tell you about the resources and not go with you to them?
3. How would you feel about that person visiting you in your home?
4. Do you think it would be easier to work with them while you are here at the eye doctor’s office or afterwards?
5. Do you feel you would be able to trust the resources in your community, and if not, why?
6. [Conclusion]
7. These are all the questions I have for you today. Is there anything else you would like to share with us? Thank you so much for your time.

**Supplemental Table 1. Participant acceptance of discussing SDoH in clinic.**

| **Topic** | **Themes** | **Frequency (%)** | **Quote** |
| --- | --- | --- | --- |
| Acceptability to SDOH discussion in clinic | Disposition about SDOH topic discussion in clinic | Positive: 44 (88%)  Neutral: 3 (6%)  Negative: 1 (2%) | “I think it is [appropriate], a lot of people need a lot of resources and that's going to help keep the appointments”  “Absolutely, most people don't understand what's out there for them”  “It makes me feel they are dedicated. They want to know what's going on at home [and] assist in whatever way they can. Acknowledging is the first step and I think that's comforting to the patient wanting to continue care”  “I think it's appropriate, but a lot of people might think it's kind of…embarrassing maybe and they don't want to talk about it.”  “I don’t know [if] that matters”  “I don't think…it's not going to help any one” |
|  | Who should ask SDOH related questions? | Anybody: 26 (52%)  Other staff: 12 (24%)  Doctor: 10 (20%)  Specialized staff: 7 (14%)  Not front desk: 7 (14%)  Nobody: 1 (2%) | “I'm comfortable with anyone asking that question, especially if it's the people that I'm seeing often. Again, it's just establishing that relationship”  “It doesn't matter. Most people would probably prefer the doctor, but what doctor has time to sit down and do a survey?”  “I feel like the doctor has the higher quality of having connections to get to [know] anything. Anybody in reception what would they know, they normally answer the phones. Not even the techs because what are the techs going to do, they're going to sit back and maybe gossip unless they actually know the rule of HIPAA”  “...I think that it should only be the doctor. I think it should be a person who is tactful…and that person who does that kind of work”  “Mostly the doctor or like a social work or something like that”  “I guess a nurse practitioner, someone that is qualified”  “Not (front desk) because that means they could tell anybody. [Maybe] the person that takes you to the doctor while you wait. They could be asking you the questions”  “I don't have a problem if they ask, but I wouldn't want them to ask because they're the front desk. Somebody may feel bad if they need transportation [and] everybody is listening”  “The nurse or the technicians? But definitely not the front desk.”  “I don't know. It's just me. Like, I just don't look know who to trust no more” |
|  | When is the ideal time to discuss SDOH topics in clinic? | After appointment: 25 (50%)  Before appointment: 15 (30%)  During appointment: 10 (20%)  Other/neutral: 3 (6%) | “Basically, after the appointment, because you're trying to get the appointment done and after we did the appointment, is when I got the time”  “After… that way you can say the visit went well with your doctor today and then you can let them know [about problems]”.  “it could be either in the beginning or after I wouldn't have a problem with either”  “I think you should let them know before…their appointment…As they have an appointment so that they can actually look and see exactly what [is going on]”  “Before or after or during whatever they want you to do”  “If they…able to ask you when you're checking in, I think that's when they should do it. Or even when you finish with your doctor”  “During like if someone's waiting in the waiting room, that might be the best time because they're kind of like a captive audience”  “During check in ask them if they had any problems coming in and…then after the visit [ask] will you be able to come to the next appointment?” |
|  | In what format should the SDOH questions be asked? | Verbal: 28 (56%)  Written: 10 (20%)  Both: 8 (16%)  NA: 4 (8%) | “One on one. A lot of the packets with questions are kind of intimidating for patients and people just don't like writing anymore”  “One-on-one…I'm reading from the paper. I'm going to answer the question that I want to, but that may not be what you're looking for”  “I would rather talk in person.. Sometimes a question I might not really understand it, and if you talking in person, you can get a better understanding. Because they will try to explain it to you”  “The paper would be better because if people have problems, they may have an issue with articulating the need for help..they can write it down and give it to you and then you can assist in whatever way”  “I don't care. You ask me to fill out a form I’ll do it. If you want to talk to me, I’ll do it” |
|  | What is the likelihood the participant will complete a questionnaire during their appointment? | High: 19 (38%)  Mixed: 11 (22%)  Low: 10 (20%)  NA: 10 (20%) | "I would fill it out if they needed it, OK? I mean and everything's going to help."  “on scale of 1 to 10, 10”  “If y'all, give me some paper, I will take it to my sister and let her fill it out for me. And then I come bring it back”  “I'll fill it out as much as I can. Then I will go to them and say I don't really understand this area”  "Sometimes they say it's a quick survey, but then it's this book of  5-6 pages full of questions in which multiple of the questions are the exact same questions"  "Just don't make it too long. Try to keep it simple and put on there the most important things you know. Ask them what your biggest problem is with returning for your appointment”  “I think between seven and the 8”  “I think I will go through all the questionnaire and see what is there”  “ I'm skipping stuff that I don't wanna answer”  "You know what I do with all the Johns Hopkin surveys that come in my mail. [I throw them in the trash] I don't fill them out at all. I'm a people person, I'm not doing all that paperwork. I'm not doing it on no tablet" |
|  | What topics are off limits during SDOH discussion? | None: 41 (82%)  Personal: 2 (4%)  Abuse: 1 (2%)  Relationships partner: 2 (4%)  Sex life: 1 (2%)  Stick to eye health: 1 (2%) | "[None] I'll tell you why If you don't tell them everything… they cannot offer you the best help… If you're a dope addict, then say you’re a dope addict."  “No, they should know everything. Like what is your income and how many children you have..”  “[None] it doesn't matter to me. Like I said I feel like you care"  "Just don’t get too personal, like what is your income and how many children you have"  “I would just want to hear from them [just] about my health. My eyes”  “Maybe [dont ask] the abuse part…People I know I feel uncomfortable because what does that have to do with eye care”  “[Dont ask], if you have a partner. It can be difficult”  "None as far as my eyes are concerned” |

**Supplemental Table 2: Patient provided ideas to address barriers to eye care.**

| **Topic** | **Themes** | **Frequency (%)** | **Quote** |
| --- | --- | --- | --- |
| Ideas on addressing SDOH | Improve communication | 22 (44%) | “If a patient that I know had missed an appointment previously, I'd call their residence and say, hey, is there anything that we here at Johns Hopkins could do to assist you in getting to those appointments, we want to make sure that you have what you need to be seen and get the proper healthcare”  “...just better communication with the patients”  “ You can never provide enough information and you can not communicate enough”  “...somebody calling…[and] reminders” |
|  | Increase or maintain level of care | 20 (40%) | “Well, the service I got today I thought was. Excellent”  “I wouldn't change nothing because when I come to JH I'm treated well"  “You can get everything out of Hopkins. Housing, healthcare, help [for] the older people, they get on a big old bus and go places, go recreation all day long, get lunch, get [dinner] done. Whatever you need. Hopkins is one of the best”  “I was impressed when I come in, everything was new and clean [but] we're standing in a secondary waiting room or secondary exam room, there’s trash on the floor. When I come to a hospital, it shouldn't be like that”  “She [staff] wheeled me to the front desk and just left me.. I treat people the way I want to be treated. I think it should be like that" |
|  | Increase access to and inform about resources | 18 (36%) | “Let the patient know that there's a number you can assist with that we have this available to you so the person can know that the resources are available”  “Sometimes it takes education. Sometimes people don't know how to access their insurances–suggest… them to call insurance people, see if it's transportation related that could be educational as well. On that viewpoint you can never provide enough information”  “I believe there is a lot of resources outside from the government. and a lot of people don't have access to it…So if you can get all those,…how they can come about it, what the county is offering, what the state is offering so they can apply from there”  “Read up on the Internet about your diagnosis and read up on Wilmer and see what they can do for you. Encourage them to educate themselves.” |
|  | Counseling/access to social worker | 16 (32%) | “A department coordinator might be good. They could make somebody comfortable with their primary goal of just to help you and if you need help with finances, they can provide resources. If you need help with prescription, they can provide resources”  “The only thing I can think of [social worker], that could probably help somebody" |
|  | Provide transportation | 14 (28%) | “When I make the appointment say, do you have any transportation needs, which could be something that could be adjusted prior when they [give] the reminder 3-4 day before”  “Transportation, come pick them up the person who has no transportation. [Provide] Lyft or Uber to them. Pick them up and send them back home in one. They can get to the appointment [this way]”  “I have problems with transportation because most times I have to cut something to get here because I know it's important”  “Yeah, mobility. If they have problems, they can always contact mobility” |
|  | Assist patients with technology/ Use technology to help | 6 (12%) | “Use mychart to inform people of resources”  “Because as you get older well,[you] can't do all that MyChart stuff  I have to go to my daughter-in-law or my daughter”  “Some type of Wellness screening. Something that you could take if possible on paper or online. If I answered this question, that tells me that I need to go see eye doctor” |
|  | Who would they trust to ask SDOH related questions? | Social worker: 14 (28%)  Doctor: 11 (22%)  Anybody: 13 (26%)  Nobody: 2 (4%)  NA: 9 (18%)  Administrator: 1 (2%) | “It wouldn't hurt to have a specific person [social worker] do it, if you have somebody who's taking it on [additional] to their job, they're going to be less likely to to to care about it in a constructive way”  "Do you have social workers?"  “Go see the social worker. They get [me] everything”  “My primary care. If I'm a person that doesn't have a primary care, I look for the library for information, or I would look for a community source”  “Anybody in the medical field is going to be hopeful. It could be a social worker or your doc or doc’s assistants a variety of staff, I’m sure”  “...It's like I trust the doctor and stuff, but I don't trust the counselor, because I had told her so much about me that she laughed straight in my face and I had stopped and going”  “...I don't have trust in anyone” |
|  | Would others be receptive to such kind of help (SDOH discussion during clinic visit)? | Yes: 30 (60%)  Mixed: 4 (8%)  NA: 16 (32%) | “I don't see why not, you're here to help”  “If they need help, yeah.”  “I think that they would be receptive”  “I think that they would that they be happy”  “Depends on what people are going through”  “People are grouchy in Baltimore City and you deal with a lot. And it it's difficult.” |
|  | Current knowledge of programs that help address barriers to care? | None: 18 (36%)  Limited: 15 (30%)  Moderate: 11 (22%)  Extensive: 5 (10%)  NA: 1 (2%) | “...I don't know any programs…I’m not aware of any names”  “That I don’t know”  “Maryland gives mobility [for] somebody that had a physical problem with coming”  “We got housing on Pratt, we have the Caroline Center. Little house on the Broadway. I work in the school systems they got different programs. They have food pantries and we try to bring them into most of the schools and its open for both adults and youth”  “I'm a big advocate for helping patients myself. So I usually call their insurance to [ask if they] have any transportation. I do a lot of the groundwork with my patients”  “We have a Senior Community Center and they [are] pretty well”  “Doors and healthcare for the homeless. They help with dentures, vaccinations, clothes, homelessness and any program you need” |
|  | Current knowledge of programs by Wilmer to address barriers to care? | None: 39 (78%)  Limited: 5 (10%)  Moderate: 3 (6%)  NA: 3 (6%) | “No, just the clinic”  “The only program I'm aware of is mobility…That's it”  “No, I don't. I'm new [patient here]. I've been going to University of Maryland, Chase Braxton and a couple other clinics, care first and stuff like that. So I don’t know any programs here at Johns Hopkins.” |
